1 The genome sizes of ostracod crustaceans correlate with body size and phylogeny

2

3 Nicholas W. Jeffery<sup>1\*</sup>, Emily A. Ellis<sup>2</sup>, Todd H. Oakley<sup>2</sup>, T. Ryan Gregory<sup>1</sup>

4

5 \*Present address: Fisheries and Oceans Canada, Bedford Institute of Oceanography, Dartmouth,  
6 Nova Scotia

7

8 <sup>1</sup>Department of Integrative Biology, University of Guelph, Guelph, Ontario, Canada. N1G 2W1

9 <sup>2</sup>University of California Santa Barbara, Santa Barbara, California, USA. 93106

10

11 Corresponding author email: [nick.w.jeffery3@gmail.com](mailto:nick.w.jeffery3@gmail.com)

12

13

14 Keywords: Ostracod, genome size, C-value, body size, phylogeny

15

16

17

18

19

20

21

22

23

24

25

26

27

28

29

30

31

32

33

34

35

36

37

38

39

40

41

42

43

44

45

46 **Abstract**

47  
48 Within animals a positive correlation between genome size and body size has been detected in  
49 several taxa but not in others, such that it remains unknown how pervasive this pattern may be.  
50 Here we provide another example of a positive relationship, in a group of crustaceans whose  
51 genome sizes have not previously been investigated. We analyze genome size estimates for 46  
52 species across Class Ostracoda, including 29 new estimates made using Feulgen image analysis  
53 densitometry and flow cytometry. Genome sizes in this group range ~80-fold, a level of  
54 variability that is otherwise not seen in crustaceans with the exception of some malacostracan  
55 orders. We find a strong positive correlation between genome size and body size across all  
56 species, including after phylogenetic correction. We additionally detect evidence of XX/XO sex  
57 determination in all three species of myodocopids where male and female genome sizes were  
58 estimated. On average, genome sizes are larger but less variable in myodocopids than in  
59 podocopids, and marine ostracods have larger genomes than freshwater species, but this appears  
60 to be explained by phylogenetic inertia. The relationship between phylogeny, genome size, body  
61 size, and habitat is complex in this system, and will benefit from additional data collection across  
62 various habitats and ostracod taxa.

63

64

65

66

67

68

69

## 70 **Introduction**

71           Genome sizes (haploid nuclear DNA contents) have been estimated for more than 5,500  
72 species of animals, revealing a greater than 7,000-fold range (Gregory 2017). Some important  
73 patterns have emerged from comparative analyses of genome size, including well-established  
74 links between genome size, nucleus size, cell size, and cell division rate (Gregory, 2002;  
75 Gregory, 2005). However, the implications of these relationships at organismal and ecological  
76 levels are more complex. Body size (Gregory, Hebert and Kolasa, 2000; Jeffery, Yampolsky and  
77 Gregory, 2016; Wyngaard, *et al.*, 2005), metabolic rate (Gregory, 2002; Vinogradov, 1995),  
78 developmental rate (Gregory, 2002; Gregory and Johnston, 2008), life history (Rees, *et al.*, 2007;  
79 Reeves, *et al.*, 1998) , and geographic distribution (Bonnivard, *et al.*, 2009) have been found to  
80 correlate with genome size in some animal groups, but these are far from universal, and depend  
81 on the biology of the animals in question. Sorting out the broader patterns of genome size  
82 diversity and its biological significance therefore requires studies of a wide variety of taxa.  
83 However, many groups -- especially non-vertebrates -- remain to be studied from this  
84 perspective.

85           Ostracod crustaceans represent a group of interest in this regard, due to their ecological  
86 diversity and over 150-fold range in body size. Class Ostracoda contains an estimated 20,000  
87 species divided into four orders, the two largest of which are Myodocopida and Podocopida.  
88 About 10% of extant ostracod species are freshwater, while the remainder are marine (Horne,  
89 Cohen and Martens, 2002). Myodocopids are strictly marine, but podocopids can be found in  
90 marine, estuarine, and freshwater habitats, with three podocopid lineages having invaded non-  
91 marine habitats independently at different times since the Devonian (Martens, *et al.*, 2008). The  
92 ostracod clade has a rich fossil record (Foote and Sepkoski, 1999) dating to at least the early  
93 Ordovician (Williams, *et al.*, 2008), but molecular evidence suggests an origin at least 500

94 MYA, while divergence of Myodocopida and Podocopida occurred approximately 480 MYA  
95 (Oakley, *et al.*, 2013; Tinn and Oakley, 2008).

96 Prior to this study, there were only two published ostracod genome size estimates, with  
97 an additional 15 unpublished values included in the Animal Genome Size Database and (P.D.N.  
98 Hebert unpublished). Genome size estimates are sparse for crustaceans in general, and obtaining  
99 a greater number of estimates for ostracods will provide data for potential genome sequencing  
100 projects and provide a better understanding of how a basic organismal property such as genome  
101 size can influence the overall life history of these crustaceans.

102 Here, we report new estimates for 29 species of ostracods from two orders -  
103 Myodocopida and Podocopida - and analyze them in combination with publicly available  
104 estimates. We also constructed a genus-level phylogeny for the taxa with genome size estimates  
105 using 18S rRNA sequences to examine genome size diversity across the ostracod phylogeny.  
106 This allowed us to test possible relationships between genome size and body size within a  
107 phylogenetic context, and to examine patterns of genome size distribution across taxa and  
108 habitats.

## 109 **Methods**

### 110 *Specimen collection and biological/ecological trait data*

111 We collected sediment samples from various locations in Canada, the United States, and  
112 Australia (Table 1, Supplementary Table S1). To collect marine and freshwater species, we used  
113 a 150 $\mu$ m plankton net to horizontally collect the top half-inch layer of sediment from the  
114 benthos. The resulting sediment from marine samples was further sorted using a 500 $\mu$ m sieve  
115 and a 100 $\mu$ m sieve, and sorted by eye using a dissection microscope. We collected some species  
116 at night – as many are known to be nocturnally active in search of mates (Speiser, *et al.*, 2013) –

117 by using a light trap and vertical plankton tows. In many cases, we were able to identify taxa to  
118 the species level using published generic and specific dichotomous keys. We measured total  
119 body size (length of carapace) using an ocular micrometer.

#### 120 *Genome size estimation*

121 Ostracods were dissected from their valves in 40%(v/v) acetic acid on microscope slides  
122 using insect pins, flattened with a coverslip which was held onto the slide with a clothespin, and  
123 then frozen on dry ice. The coverslip was then removed with a razor blade and the slides were  
124 immersed in 100% ethanol and dried at room temperature.

125 All prepared slides were fixed in 85:10:5 methanol:formalin:acetic acid overnight. The  
126 slides underwent hydrolysis in 5N HCl at 20°C for 120min. The slides were stained in prepared  
127 Schiff reagent for 120min, followed by 3 rinses in bisulfite solution and repeated rinses in  
128 deionized water (Hardie et al. 2002). Each set of slides was co-stained with slides of domestic  
129 chicken blood (1C=1.25pg) and rainbow trout blood (1C=2.60pg) for use as internal standards.  
130 Individual nucleus densities were measured using a Leica DM LS compound microscope with a  
131 mounted Optronics DEI-750 CE CCD camera and Bioquant Life Science software.

132 We estimated the genome size of some species by flow cytometry (Table 1). Specimens  
133 were crushed in 500µl cold LB01 buffer (Dolezel, Binarova and Lucretti, 1989) and co-stained  
134 with chicken blood or crushed *Daphnia pulex* (1C=0.23pg) after adding 12µl propidium iodide  
135 (24µg/ml) and 2µl RNase (4µg/ml) to each sample. These were stained in the dark for 1 hour and  
136 analyzed on an FC500 flow cytometer (Beckman-Coulter). All coefficients of variation (CVs)  
137 were <8% and a minimum of 1000 nuclei per ostracod were analyzed.

138 We included 17 estimates from the Animal Genome Size Database ([www.genomesize.com](http://www.genomesize.com))  
139 (Hebert, unpublished). These estimates used epithelial tissue dissected from ostracods, but the  
140 standard used for estimation is unknown.

#### 141 *Statistical analyses and phylogenetic correction*

142 We first applied a general linear model of log-transformed genome size, log-transformed  
143 body size, and habitat type as a categorical variable (0=freshwater, 1=marine) to test for  
144 significant relationships between variables without phylogenetic correction. To correct for  
145 phylogenetic non-independence of our data, we used software implemented in the publically  
146 available Galaxy computing platform Osiris (Oakley, *et al.*, 2014), to estimate a genus-level  
147 phylogeny from publicly available 18S ribosomal RNA sequences (Supplementary Table S2).  
148 These sequences were aligned using MUSCLE v3.8 (Edgar, 2004). We performed maximum-  
149 likelihood and bootstrap statistical analyses in Garli v2.0 (Gutell and Jansen, 2006) using a  
150 GTR+G model with 8 gamma categories. For tips in the phylogeny for which we had multiple  
151 species per representative genus in the phylogeny, we took the average genome size. The  
152 resulting phylogeny had 16 genera of ostracods and relationships were consistent with previously  
153 published phylogenies (Oakley, *et al.*, 2013; Tinn and Oakley, 2008) (Figure 1). We used the  
154 package *phytools* (Revell, 2012) in R v3.2.3 to map genome size onto our phylogeny and  
155 conduct a test for phylogenetic signal using Pagel's lambda. We then conducted a phylogenetic  
156 generalized least squares model of genome size, body size, and habitat, using lambda as the  
157 correlation structure, and implemented in the R packages *ape* (Paradis, Claude and Strimmer,  
158 2004) and *nlme* (Pinheiro, *et al.*, 2014).

#### 159 **Results**

160 Genome size estimates for all analyzed ostracods range approximately 80-fold, from  
161  $0.11 \pm 0.003$  pg (mean  $\pm$  s.e.) in the podocopid *Xestoleberis* sp. to  $8.98 \pm 0.14$  pg in the myodocopid  
162 *Asteropterygion climax* (Figure 1). Freshwater ostracods, found entirely in the order Podocopida,  
163 had an average genome size of  $0.86 \pm 0.09$  pg, while marine ostracods from both Podocopida and  
164 Myodocopida had an average genome size of  $2.88 \pm 0.46$  pg. The single estuarine species in this  
165 study, *C. beaconensis*, had a small genome size of  $0.28 \pm 0.02$  pg. Larger genomes are found  
166 within Myodocopida on average ( $3.81 \pm 0.51$  pg) versus the Podocopida ( $0.82 \pm 0.11$  pg); however,  
167 the Podocopida exhibit a higher coefficient of variation in genome size (73.6%) relative to  
168 Myodocopida (49.8%). For three species within Myodocopida, we estimated genome size for  
169 both males and females, and found that males have lower DNA content by an average of 6.3%  
170 (Table 1).

171 A linear regression of non-phylogenetically corrected log-transformed genome size  
172 versus body size showed a significant positive relationship across all of the species for which  
173 genome sizes were estimated in this study ( $r^2=0.47$ ,  $p<0.0005$ ,  $n=41$ ) (Figure 2), and a general  
174 linear model of genome size, body size, and habitat revealed that both body size and habitat were  
175 significantly associated with genome size ( $t=6.351$  and  $p<0.0001$ ,  $t=3.076$  and  $p=0.004$   
176 respectively). When splitting ostracods by order, both myodocopids and podocopids showed a  
177 significant relationship between transformed genome size and body size ( $r^2=0.53$ ,  $p=0.002$  and  
178  $r^2=0.31$ ,  $p=0.001$  respectively) (Figure 2). To examine this relationship within a phylogenetic  
179 context, it was necessary to conduct the analysis at the genus level ( $n=15$  genera). After  
180 controlling for phylogeny, body size remained significantly associated with genome size ( $t=3.63$ ,  
181  $p=0.004$ ) but habitat did not ( $t=-0.45$ ,  $p=0.66$ ). Overall, genome size showed moderate but  
182 significant phylogenetic signal for the genera examined here ( $\lambda=0.60$ ,  $p=0.027$ ).

## 183 **Discussion**

### 184 *Genome size in ostracods*

185           We revealed an 80-fold range in genome size within ostracods, a large range which has  
186 not been observed in other crustaceans with the exception of Isopoda and Amphipoda (Jeffery,  
187 2015). Our genus-level phylogeny is largely consistent with previously published phylogenies  
188 (e.g. Yamaguchi and Endo, 2003) and we find moderate but significant phylogenetic signal for  
189 genome size across the phylogeny. This suggests that genome size evolution deviates from a  
190 pure Brownian motion model, which would be expected if  $\lambda=1.0$ , and rather that genome size  
191 correlates modestly among closely related species and differs between more deeply divergent  
192 clades. This could be consistent with evidence for potential polyploidy or quantum leaps in  
193 genome size across this phylogeny, such as the case between the sister-genera *Tetraleberis* and  
194 *Asteropterygion*, where the genome of *Asteropterygion* is nearly double that of *Tetraleberis*.  
195 Discontinuous patterns of genome size have been reported in other crustaceans, including  
196 copepods (e.g. Gregory, *et al.*, 2000).

### 197 *Genome size, body size, habitat, and sex*

198           Larger genomes are observed in the order Myodocopida, which have larger body sizes  
199 than the Podocopida. Moreover, the positive relationship between genome size and body size  
200 remained even after correcting for phylogeny. This positive relationship between body size and  
201 genome size has only been observed in few other crustaceans, including copepods (Gregory, *et*  
202 *al.*, 2000; Wyngaard and Rasch, 2000), amphipods, and some branchiopods (Hessen and  
203 Persson, 2009). This correlation suggests that body size is a good predictor of genome size in  
204 ostracods, though this is by no means an exhaustive examination of this trend. It remains to be  
205 seen how general the body size correlation is within and among crustacean groups (and other



206 animals) more broadly. It is likely that this relationship will be most evident when cell numbers  
207 contribute less to body size diversity than individual cell sizes.

208 Habitat initially was revealed to be significantly correlated with genome size, as larger  
209 genomes appear to be found in marine habitats. However after correcting for phylogeny, habitat  
210 remained no longer significant. This is because Myodocopida are entirely marine and have larger  
211 genome sizes than the predominantly freshwater Podocopida, but within Podocopida the marine  
212 species we examined had smaller genomes than freshwater species. Denser taxon sampling could  
213 certainly change these conclusions.

214 We revealed that in the three myodocopid species for which we had individuals of each  
215 sex, males had smaller genome sizes than their female counterparts. This is consistent with an  
216  $XX_{\text{♀}}/XO_{\text{♂}}$  sex determination system in which males lack one copy of a sex chromosome that is  
217 present in two copies among females (Moguilevsky, 1990). The extent to which this sex  
218 determination system occurs across ostracods is unknown, but we detected evidence in Families  
219 Cypridinidae and Philomedidae, and previous research has found evidence in each of these  
220 families (Moguilevsky, 1985; Moguilevsky, 1990; Rivera and Oakley, 2009). This suggests that  
221 the common ancestor of all myodocopids had  $XX/XO$  sex determination (Figure 1).

#### 222 *Alternative hypotheses of genome size evolution*

223 We observe here that genome size is highly variable among ostracods and that genome  
224 size correlates with body size, but are unable to determine if these patterns are the result of  
225 ecological pressures leading to rapid genome size change in extant species. Podocopids possess  
226 much smaller genomes than myodocopids on average, suggesting that they are subject to  
227 additional constraints on genome size, perhaps relating to body size or other ecological pressures  
228 that impact cell size and/or cell division rate. Indeed, the myodocopids tend to be physically

229 larger in size than podocopids. It is also noteworthy that the Myodocopida are strictly marine,  
230 whereas the Podocopida inhabit a much broader range of habitats (leaf litter, freshwater,  
231 brackish, marine) (Martens, *et al.*, 2008). This could help to explain why, despite small absolute  
232 genome sizes, the Podocopida exhibit higher relative variability in genome size due to  
233 differential selective pressures in different environments, as reflected by coefficient of variation.  
234 While on average we find larger genomes in marine species, a simple marine versus freshwater  
235 distinction is not likely to account for genome size differences across ostracods, however, given  
236 that within the Podocopida, marine species tend to have smaller genomes than freshwater  
237 species. Within Ostracoda, genome size may thus be driven by differential selective pressures for  
238 changes in body size within lineages and across habitat types.

#### 239 *Concluding remarks*

240 The present study has highlighted some interesting patterns in genome size diversity among  
241 the previously overlooked Ostracoda. We provided new genome size estimates for 29 species of  
242 ostracods relative to only 17 estimates contained within the Animal Genome Size Database.  
243 Even with a comparatively small sampling of overall ostracod diversity, a more than 80-fold  
244 range in genome size was observed. This, combined with the relationships between genome size  
245 and body size, and potential differences in selective pressures from different habitats indicate  
246 that this is an excellent group to target for further study.

247

#### 248 **Authors' Contributions**

249 NWJ and TRG conceived of the study. NWJ, EAE, and THO collected and identified specimens.  
250 NWJ and EAE prepared the samples and EAE constructed the phylogeny. NWJ and EAE  
251 analyzed the samples and results. NWJ, EAE, THO, and TRG wrote the paper. All authors edited  
252 and approved of the paper.

253

254

255

256 **Acknowledgements**

257 We are thankful to Dr. Paul Hebert for allowing us to include his unpublished ostracod genome  
258 size data. We are also grateful to Alexandra Wen and Abigail Chua for their assistance in  
259 collecting and preparing slides for genome size analysis. We thank the Australian Museum (loan  
260 number MI2013059) for loaning us prepared slides and Paul Valentich-Scott for assistance in  
261 accessioning slides (accession numbers x-x) at the Santa Barbara Museum of Natural History.

262

263 **Funding**

264 NWJ and TRG are supported by the National Sciences and Engineering Research Council of  
265 Canada (Canada Graduate Scholarship and Discovery Grant, respectively). This research was  
266 funded through National Science Foundation Grant #DEB-1146337 to THO, Research  
267 Mentorship Program funding to A. Wen and EAE, and Australian Museum Grant #SB14014 to  
268 Celia K.C. Churchill.

269

270

271 **Data Availability**

272 Sampling locations and species identifications are available in Table 1. All 18S sequence  
273 Genbank accession numbers are provided in Supplementary Table S1. All genome size estimates  
274 will be publicly available in the Animal Genome Size Database prior to final publication.

275 **References**

- 276 BONNIVARD E, CATRICE O, RAVAUX J, BROWN SC, HIGUET D. 2009 Survey of genome size in 28  
277 hydrothermal vent species covering 10 families. *Genome*. 52(6):524-536.
- 278 DOLEZEL J, BINAROVA P, LUCRETTI S. 1989 Analysis of Nuclear-DNA Content in Plant-Cells by Flow-  
279 Cytometry. *Biologia Plantarum*. 31(2):113-120.
- 280 EDGAR RC. 2004 MUSCLE: multiple sequence alignment with high accuracy and high throughput. *Nucleic  
281 acids research*. 32(5):1792-1797.
- 282 FOOTE M, SEPKOSKI JJ. 1999 Absolute measures of the completeness of the fossil record. *Nature*.  
283 398(6726):415-417.
- 284 GREGORY TR. 2002 A BIRD'S-EYE VIEW OF THE C-VALUE ENIGMA: GENOME SIZE, CELL SIZE, AND  
285 METABOLIC RATE IN THE CLASS AVES. *Evolution*. 56(1):121-130.
- 286 GREGORY TR. 2002 Genome size and developmental complexity. *Genetica*. 115(1):131-146.
- 287 GREGORY TR. 2005 *The evolution of the genome*. Academic Press.
- 288 GREGORY TR, HEBERT PD, KOLASA J. 2000 Evolutionary implications of the relationship between  
289 genome size and body size in flatworms and copepods. *Heredity*. 84(2):201-208.
- 290 GREGORY TR, JOHNSTON J. 2008 Genome size diversity in the family Drosophilidae. *Heredity*.  
291 101(3):228-238.
- 292 GUTELL RR, JANSEN RK. 2006 Genetic algorithm approaches for the phylogenetic analysis of large  
293 biological sequence datasets under the maximum likelihood criterion.
- 294 HESSEN DO, PERSSON J. 2009 Genome size as a determinant of growth and life-history traits in  
295 crustaceans. *Biological Journal of the Linnean Society*. 98(2):393-399.
- 296 HORNE DJ, COHEN A, MARTENS K. 2002 Taxonomy, morphology and biology of Quaternary and living  
297 Ostracoda. *The Ostracoda: applications in Quaternary research*.5-36.
- 298 JEFFERY NW. 2015. *Genome Size Diversity and Evolution in the Crustacea: The University of Guelph*.
- 299 JEFFERY NW, YAMPOLSKY LY, GREGORY R. 2016 Nuclear DNA content correlates with depth, body size,  
300 and diversification rate in amphipod crustaceans from ancient Lake Baikal, Russia. *Genome*.(ja).
- 301 MARTENS K, SCHÖN I, MEISCH C, HORNE DJ. 2008 Global diversity of ostracods (Ostracoda, Crustacea) in  
302 freshwater. *Hydrobiologia*. 595(1):185-193.
- 303 MOGUILEVSKY A. 1985 Cytogenetic studies on marine ostracods: the karyotype of *Gigantocypris  
304 muelleri* Skogsberg, 1920 (Ostracoda, Myodocopida). *Journal of Micropalaeontology*. 4(2):159-164.
- 305 MOGUILEVSKY A. 1990 Cytogenetic studies on marine myodocopid Ostracoda: the karyotypes of some  
306 species of *Vargula* Skogsberg, 1920. In: *Ostracoda and global events*., pp. 187-208. Springer.
- 307 OAKLEY TH, ALEXANDROU MA, NGO R, PANKEY MS, CHURCHILL CK, CHEN W, LOPKER KB. 2014 Osiris:  
308 accessible and reproducible phylogenetic and phylogenomic analyses within the Galaxy workflow  
309 management system. *BMC bioinformatics*. 15(1):1.
- 310 OAKLEY TH, WOLFE JM, LINDGREN AR, ZAHAROFF AK. 2013 Phylotranscriptomics to bring the  
311 understudied into the fold: monophyletic ostracoda, fossil placement, and pancrustacean phylogeny.  
312 *Molecular biology and evolution*. 30(1):215-233.
- 313 PARADIS E, CLAUDE J, STRIMMER K. 2004 APE: analyses of phylogenetics and evolution in R language.  
314 *Bioinformatics*. 20(2):289-290.
- 315 PINHEIRO J, BATES D, DEBROY S, SARKAR D. 2014 R Core Team (2014) nlme: linear and nonlinear mixed  
316 effects models. R package version 3.1-117. See <http://CRAN.R-project.org/package=nlme>.
- 317 REES DJ, DUFRESNE F, GLEMET H, BELZILE C. 2007 Amphipod genome sizes: first estimates for Arctic  
318 species reveal genomic giants. *Genome*. 50(2):151-158.
- 319 REEVES G, FRANCIS D, DAVIES MS, ROGERS HJ, HODKINSON TR. 1998 Genome size is negatively  
320 correlated with altitude in natural populations of *Dactylis glomerata*. *Annals of Botany*. 82(suppl 1):99-  
321 105.

- 322 REVELL LJ. 2012 phytools: an R package for phylogenetic comparative biology (and other things).  
323 *Methods in Ecology and Evolution*. 3(2):217-223.
- 324 RIVERA AS, OAKLEY TH. 2009 Ontogeny of sexual dimorphism via tissue duplication in an ostracod  
325 (Crustacea). *Evolution & development*. 11(2):233-243.
- 326 SPEISER DI, LAMPE RI, LOVDAHL VR, CARRILLO-ZAZUETA B, RIVERA AS, OAKLEY TH. 2013 Evasion of  
327 predators contributes to the maintenance of male eyes in sexually dimorphic euphilomedes ostracods  
328 (Crustacea). *Integrative and comparative biology*.ict025.
- 329 TINN O, OAKLEY TH. 2008 Erratic rates of molecular evolution and incongruence of fossil and molecular  
330 divergence time estimates in Ostracoda (Crustacea). *Molecular phylogenetics and evolution*. 48(1):157-  
331 167.
- 332 TURGEON J, HEBERT PD. 1994 Evolutionary interactions between sexual and all-female taxa of  
333 *Cyprinotus* (Ostracoda: Cyprididae). *Evolution*.1855-1865.
- 334 VINOGRADOV AE. 1995 Nucleotypic effect in homeotherms: body-mass-corrected basal metabolic rate  
335 of mammals is related to genome size. *Evolution*.1249-1259.
- 336 WILLIAMS M, SIVETER DJ, SALAS MJ, VANNIER J, POPOV LE, POUR MG. 2008 The earliest ostracods: the  
337 geological evidence. *Senckenbergiana lethaea*. 88(1):11-21.
- 338 WYNGAARD G, RASCH E. 2000 Patterns of genome size in the copepoda. *Hydrobiologia*. 417(1):43-56.
- 339 WYNGAARD GA, RASCH EM, MANNING NM, GASSER K, DOMANGUE R. 2005 The relationship between  
340 genome size, development rate, and body size in copepods. *Hydrobiologia*. 532(1-3):123-137.
- 341 YAMAGUCHI S, ENDO K. 2003 Molecular phylogeny of Ostracoda (Crustacea) inferred from 18S  
342 ribosomal DNA sequences: implication for its origin and diversification. *Marine biology*. 143(1):23-38.

343

344

345

346

347

348

349

350

351

352

353

354

355

356 **Figure captions**

357

358 **Figure 1.** Genus-level 18S phylogeny showing podocopid and myodocopid clades with genome  
359 size mapped onto the branches. The transition to freshwater is marked with a star, and the  
360 reversal to marine is marked with a black bar.

361

362

363 **Figure 2.** Log-transformed body size versus log-transformed genome size in (A) 41 species of  
364 ostracods showing a significant positive relationship ( $r^2=0.47$ ,  $p<0.0005$ ) and (B) splitting the  
365 relationship by order reveals a significant relationship within both Myodocopida and Podocopida  
366 ( $r^2=0.53$ ,  $p=0.002$  and  $r^2=0.31$ ,  $p=0.001$  respectively). Dot size is proportional to genome size in  
367 panel B) to show the larger genomes in Myodocopida overall.

368

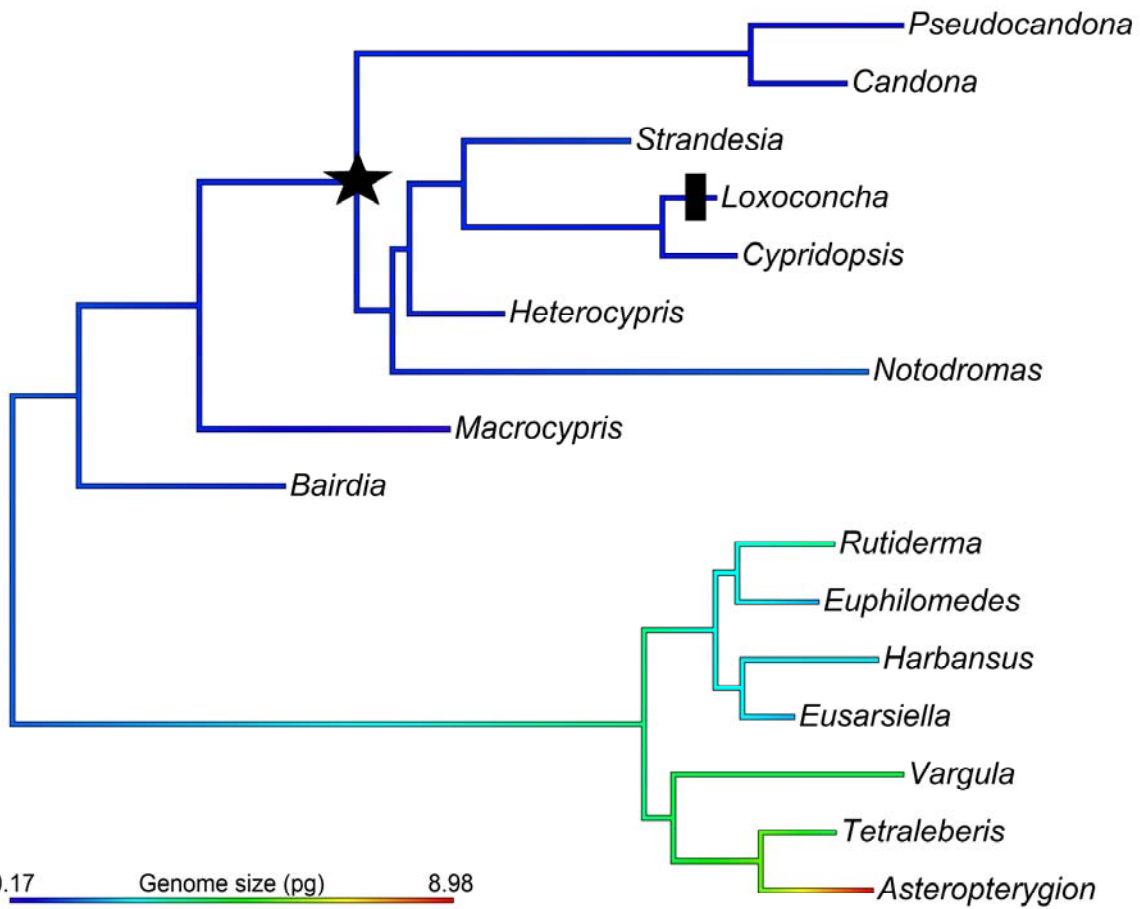

369  
370  
371  
372

Figure 1.

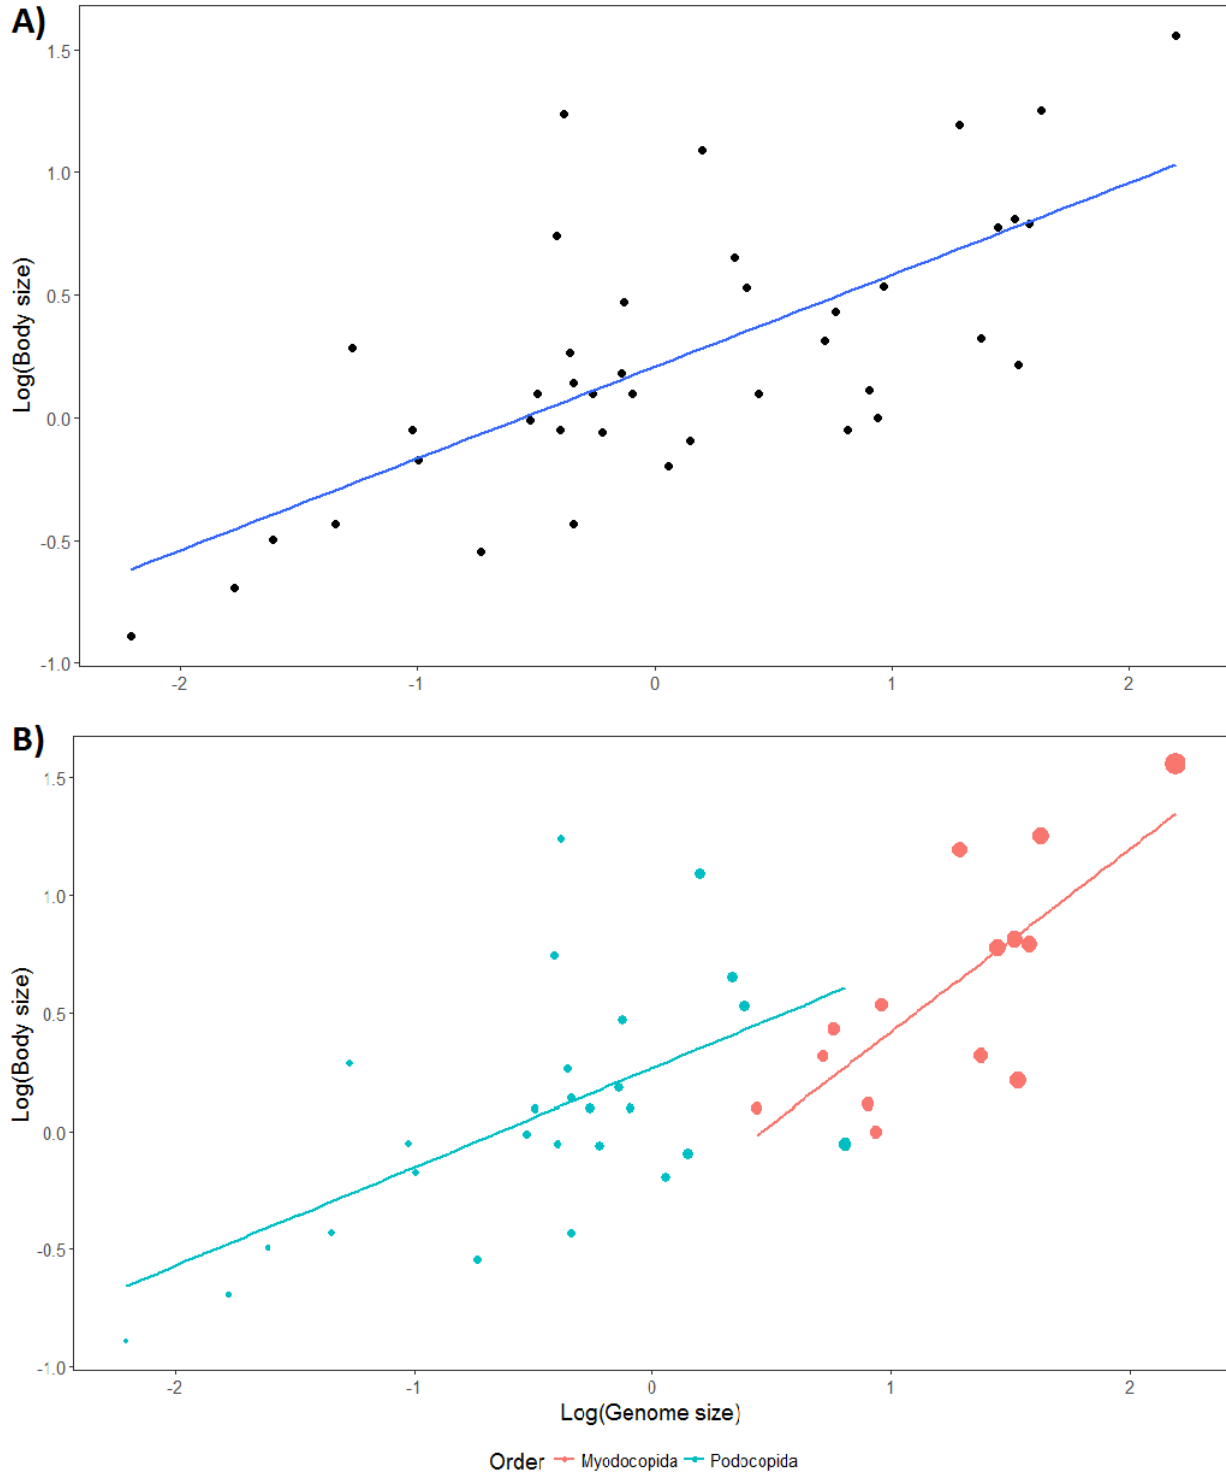

373  
374

Figure 2.



375 **Table 1.** Genome size estimates in picograms for 46 species of ostracods from the orders Myodocopida and Podocopida collected  
 376 from Canada, Australia and the USA. When known, the sex is also listed after the species name. The data includes published values  
 377 for two species as well as unpublished data by P. Hebert.

| Family              | Species                                 | Genome size $\pm$ SE (pg) | n= | Habitat | Locality            |
|---------------------|-----------------------------------------|---------------------------|----|---------|---------------------|
| <b>Myodocopida</b>  |                                         |                           |    |         |                     |
| Cylindroleberididae | <i>Tetraleberis pix</i>                 | 5.10                      | 1  | Marine  | Lizard Island, Aus. |
| Cylindroleberididae | <i>Tetraleberis triplex</i>             | 3.62 $\pm$ 0.09           | 2  | Marine  | Lizard Island, Aus. |
| Cylindroleberididae | Unknown                                 | 4.85                      | 1  | Marine  | Lizard Island, Aus. |
| Cylindroleberididae | <i>Asteropterygion climax</i>           | 8.98 $\pm$ 0.14           | 4  | Marine  | Lizard Island, Aus. |
| Cypridinidae        | <i>Pterocypridina</i> sp.               | 4.57 $\pm$ 0.09           | 3  | Marine  | Lizard Island, Aus. |
| Cypridinidae        | <i>Vargula tsuji</i> (female)           | 4.46 $\pm$ 0.08           | 3  | Marine  | Santa Barbara, CA   |
| Cypridinidae        | <i>Vargula tsuji</i> (male)             | 4.05                      | 1  | Marine  | Santa Barbara, CA   |
| Philomedidae        | <i>Euphilomedes</i> sp. (female)        | 2.65 $\pm$ 0.04           | 2  | Marine  | Lizard Island, Aus. |
| Philomedidae        | <i>Euphilomedes</i> sp. (male)          | 2.58 $\pm$ 0.06           | 2  | Marine  | Lizard Island, Aus. |
| Philomedidae        | <i>Euphilomedes morini</i> (female)     | 1.59 $\pm$ 0.03           | 5  | Marine  | Santa Barbara, CA   |
| Philomedidae        | <i>Euphilomedes morini</i> (male)       | 1.49 $\pm$ 0.06           | 5  | Marine  | Santa Barbara, CA   |
| Philomedidae        | <i>Harbansus slatteryi</i>              | 2.56                      | 1  | Marine  | Lizard Island, Aus. |
| Rutidermatidae      | <i>Alternochelata lizardensis</i>       | 3.95 $\pm$ 0.14           | 4  | Marine  | Lizard Island, Aus. |
| Rutidermatidae      | <i>Rutiderma dux</i>                    | 2.47                      | 1  | Marine  | Lizard Island, Aus. |
| Rutidermatidae      | <i>Rutiderma rotunda</i>                | 4.64 $\pm$ 0.19           | 4  | Marine  | Santa Barbara, CA   |
| Sarsiellidae        | <i>Eusarsiella asciformis</i> (female)  | 2.14 $\pm$ 0.06           | 4  | Marine  | Lizard Island, Aus. |
| Sarsiellidae        | <i>Eusarsiella springthorpei</i> (male) | 2.05 $\pm$ 0.1            | 2  | Marine  | Lizard Island, Aus. |

| <b>Podocopida</b> |                                                           |           |     |            |                       |
|-------------------|-----------------------------------------------------------|-----------|-----|------------|-----------------------|
| Bairdiidae        | <i>Bairdia</i> sp.                                        | 0.91±0.04 | 3   | Marine     | Lizard Island, Aus.   |
| Candonidae        | <i>Candona candida</i> <sup>c</sup>                       | 0.59      | 1   | Freshwater | Circle, AK            |
| Candonidae        | <i>Candona rectangulata</i> <sup>a</sup>                  | 0.46      | N/A | Freshwater | Unknown               |
| Candonidae        | <i>Candocyprinotus ovatus</i> <sup>a</sup>                | 0.80      | N/A | Freshwater | Unknown               |
| Candonidae        | <i>Candocyprinotus</i> sp.                                | 0.70±0.01 | 9   | Freshwater | Twentynine Palms, USA |
| Candonidae        | <i>Pseudocandona</i> sp. <sup>c</sup>                     | 0.61      | 1   | Freshwater | Circle, AK            |
| Cyprididae        | <i>Bradleystrandesia reticulata</i> <sup>a</sup>          | 1.06      | N/A | Freshwater | Unknown               |
| Cyprididae        | <i>Bradleystrandesia splendida</i> <sup>a</sup>           | 3.13      | N/A | Freshwater | Unknown               |
| Cyprididae        | <i>Cypricercini</i> sp. <sup>a</sup>                      | 0.70      | N/A | Freshwater | Unknown               |
| Cyprididae        | <i>Cypriconcha alba</i> <sup>a</sup>                      | 1.22      | N/A | Freshwater | Unknown               |
| Cyprididae        | <i>Cypridopsis vidua</i> <sup>c</sup>                     | 0.53±0.01 | 4   | Freshwater | Guelph, ON            |
| Cyprididae        | <i>Cypridopsis vidua</i> <sup>a</sup>                     | 0.71      | N/A | Freshwater | Unknown               |
| Cyprididae        | <i>Cypris pubera</i> <sup>a</sup>                         | 0.88      | N/A | Freshwater | Unknown               |
| Cyprididae        | <i>Heterocypris glaucus</i> <sup>b</sup>                  | 0.71      | N/A | Freshwater | Churchill, MB         |
| Cyprididae        | <i>Heterocypris (Cyprinotus) incongruens</i> <sup>c</sup> | 0.77±0.01 | 4   | Freshwater | Guelph, ON            |
| Cyprididae        | <i>Heterocypris (Cyprinotus) incongruens</i> <sup>b</sup> | 0.82      | N/A | Freshwater | Canada & USA          |
| Cyprididae        | <i>Heterocypris punctata</i>                              | 1.40±0.05 | 4   | Freshwater | Twentynine Palms, CA  |
| Cyprididae        | <i>Sarscypridopsis aculeata</i> <sup>a</sup>              | 0.48      | N/A | Freshwater | Unknown               |
| Cyprididae        | <i>Spirocypris horridus</i> <sup>a</sup>                  | 1.16      | N/A | Freshwater | Unknown               |
| Cyproidinae       | <i>Cyprois marginata</i> <sup>a</sup>                     | 1.47      | N/A | Freshwater | Unknown               |

|                 |                                         |            |     |            |                     |
|-----------------|-----------------------------------------|------------|-----|------------|---------------------|
| Cyroidinae      | <i>Cypris occidentalis</i> <sup>a</sup> | 2.25       | N/A | Freshwater | Unknown             |
| Cytherideidae   | <i>Cyprideis beaconnensis</i>           | 0.28±0.02  | 2   | Estuarine  | Santa Barbara, CA   |
| Limnocytheridae | <i>Cytheridella (ilosveayi)</i>         | 0.36±0.03  | 4   | Freshwater | Santa Barbara, CA   |
| Loxoconchidae   | <i>Loxoconcha</i> sp. <sup>a</sup>      | 0.70       | N/A | Marine     | Unknown             |
| Macrocyprididae | <i>Macrocyprina barbara</i>             | 0.17±0.003 | 4   | Marine     | Santa Barbara, CA   |
| Notodromadidae  | <i>Notodromas monacha</i> <sup>a</sup>  | 0.87       | N/A | Freshwater | Unknown             |
| Xestoleberidae  | <i>Xestoleberis</i> sp.                 | 0.11±0.003 | 3   | Marine     | Santa Barbara, CA   |
| Xestoleberidae  | <i>Xestoleberis hopkinsi</i>            | 0.20±0.004 | 5   | Marine     | Santa Barbara, CA   |
| Unknown         | Unknown <sup>a</sup>                    | 1.03       | N/A | Unknown    | Unknown             |
| Unknown         | Unknown <sup>c</sup>                    | 0.66±0.005 | 5   | Freshwater | Guelph, ON          |
| Unknown         | Unknown                                 | 0.68       | 1   | Freshwater | Fox Lake, YT        |
| Unknown         | Unknown                                 | 0.67       | 1   | Freshwater | Dixie Springs, NV   |
| Unknown         | “Micropodo”                             | 0.26±0.014 | 4   | Marine     | Lizard Island, Aus. |
| Unknown         | “Aquarium”                              | 0.37±0.013 | 4   | Freshwater | Freshwater Aquarium |

<sup>a</sup>Unpublished data by Dr. Paul Hebert

<sup>b</sup>(Turgeon and Hebert, 1994)

<sup>c</sup>Genome size estimated by flow cytometry
